# Supplementary material
Source: PubMed Central journal article supplement (PMC3970323)
Supplement: NIHMS559841-supplement-Suppl_data_pdf.pdf [file NIHMS559841-supplement-Suppl_data_pdf.pdf]

# PROTEOMICS

## Supporting Information for Proteomics

**DOI 10.1002/pmic.200800157**

Karen L. Abbott, Alison V. Nairn, Erica M. Hall, Marc B. Horton, John F. McDonald,  
Kelley W. Moremen, Daniela M. Dinulescu and Michael Pierce

**Focused glycomic analysis of the *N*-linked glycan  
biosynthetic pathway in ovarian cancer**

**Supplementary Table I.**

| <b>Gene</b>                                            | <b>Abbreviation</b> | <b>Species</b> | <b>Accession #</b> | <b>Forward Primer (5' to 3')</b> | <b>Reverse Primer (5' to 3')</b> |
|--------------------------------------------------------|---------------------|----------------|--------------------|----------------------------------|----------------------------------|
| Mannoside acetylglucosaminyltransferase 1              | Mgat1               | Mouse          | NM_010794          | CCCTTCACCCAGTTGGACCTG            | GCACCATAGACCTGGGCGAG             |
|                                                        |                     | Human          | NM_002406          | GTGATTCCCATCCTGGTCAT             | TAATGCAGCAGCTTGTCCAG             |
| Mannoside acetylglucosaminyltransferase 2              | Mgat2               | Mouse          | NM_146035          | TGCTGGAGACTGTGGTATGC             | ACTCAATTTGGGCACTCTGG             |
|                                                        |                     | Human          | NM_002408          | AGCAAGAGTGCCTGAATGT              | TGCCATAGAAACTGCGACTG             |
| Mannoside acetylglucosaminyltransferase 3              | Mgat3               | Mouse          | NM_010795          | GCGTGATGGTGTGCTGTTCC             | ACAGGGACTTCCGCATGTGG             |
|                                                        |                     | Human          | NM_002409          | CGAGGGCATCTACTTCAAGC             | CGCTTGTCTCGTAGTCACC              |
| Mannoside acetylglucosaminyltransferase 4, isoenzyme A | Mgat4a              | Mouse          | NM_173870          | GCGACAGACAGAAGGC AAACC           | CCGACAGAGACGAGTGTAGGC            |
|                                                        |                     | Human          | NM_012214          | AAGGTCTACCAAGGGC ATACG           | TATCGGTGTGATAGCCCAGAA            |
| Mannoside acetylglucosaminyltransferase 4, isoenzyme B | Mgat4b              | Mouse          | NM_145926          | AGGTGACGTGGTGGACATTT             | GCTTCAGGCTCTCTTGCTCA             |
|                                                        |                     | Human          | NM_014275          | TGCACTCGTACCTGACTGACA            | GACCGAGTCTCTTCTCTCT              |
| Mannoside N-acetylglucosaminyltransferase V            | Mgat5               | Mouse          | NM_145128          | CCCTGGAAGTTGTCTCTCA              | TCCTCTGCCAGTGCCTTAAT             |
|                                                        |                     | Human          | NM_002410          | AGCCTGAAAGCAGCTCCAT              | GCCAGTGCCTTGATGTACCT             |
| Mannosidase 2, alpha 1 (Man2a1)                        | ManII               | Mouse          | NM_008549          | CTCTGGTGTCCGTGCTGGTG             | AATAGGCAGGACTGGCGAACC            |
|                                                        |                     | Human          | NM_002372          | GAGTGAGTCTGTGGAGGATGG            | GAAGATGTGAGCCAGCACCT             |
| Mannosidase 2, alpha 2 (Man2a2)                        | ManIIx              | Mouse          | NM_172903          | AAGCAGGTGACGGTGTGTGG             | TGCACTCGGTCCAGCATAAGG            |
|                                                        |                     | Human          | NM_006122          | GCCCAGCTTCTTCTCCATCT             | TGCAGCTCTGGCTTCTGAC              |
| Fucosyltransferase 8                                   | Fut8                | Mouse          | NM_016893          | AACAGAAGCAGCCTTCCACCC            | CATTCTGCGTGCGAGAAGCTG            |
|                                                        |                     | Human          | NM_178154          | GGTTCGAGCTTCCCATTGTAG            | GCGAGGTCTTCTGGTACAGC             |
| Ribosomal Protein L4*                                  | RPL4                | Mouse          | NM_024212          | GACAGCCCTATGCCGTCAGTG            | GCCACAGCTCTGCCAGTACC             |
|                                                        |                     | Human          | NM_000968          | AGAAGGCTGCTGTTGGTGTT             | TGGTTTCTTGGTAGCTGCTG             |

\*Normalization control gene
